# Supplementary material for: Sulfated Hetero-Polysaccharides Protect SH-SY5Y Cells from H2O2-Induced Apoptosis by Affecting the PI3K/Akt Signaling Pathway
Source: PubMed Central journal article supplement (PMC5408256; doi:10.3390/md15040110), 2017-04-06
Supplement: marinedrugs-15-00110-s001.pdf [file marinedrugs-15-00110-s001.pdf]

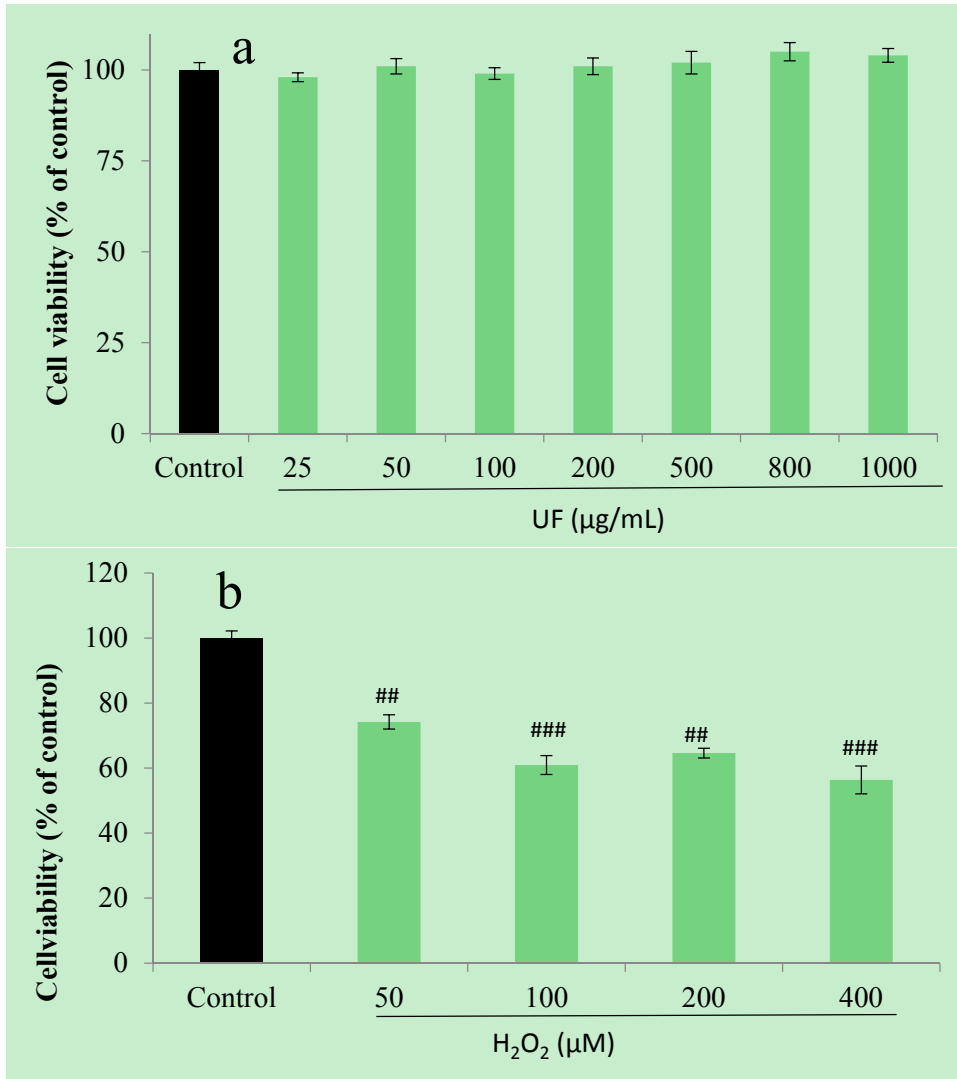

FigureS1. The effect of the samples on the neuronal injury induced by H<sub>2</sub>O<sub>2</sub>. Effects of UF on SH-SY5Y cell viability (a). Toxic effects of H<sub>2</sub>O<sub>2</sub> on SH-SY5Y cell viability (b). ## P<0.01 (Vs control group).

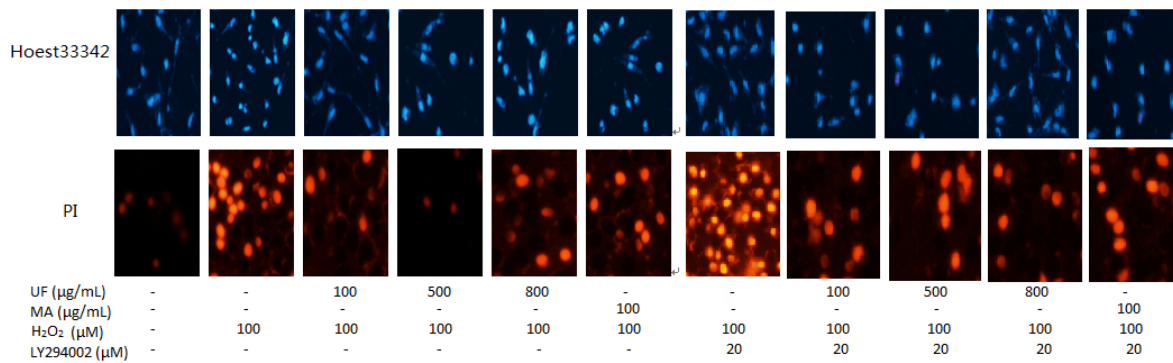

FigureS2. Nuclear morphology of H<sub>2</sub>O<sub>2</sub> and UF treated SH-SY5Y cells for 48 h, showing fragmented nuclei and micronuclei after staining with the fluorescent DAN stain Hoechst Bisbenzimidazole 33342 and observed by fluorescence. The bar scale in the picture is 50 in length.

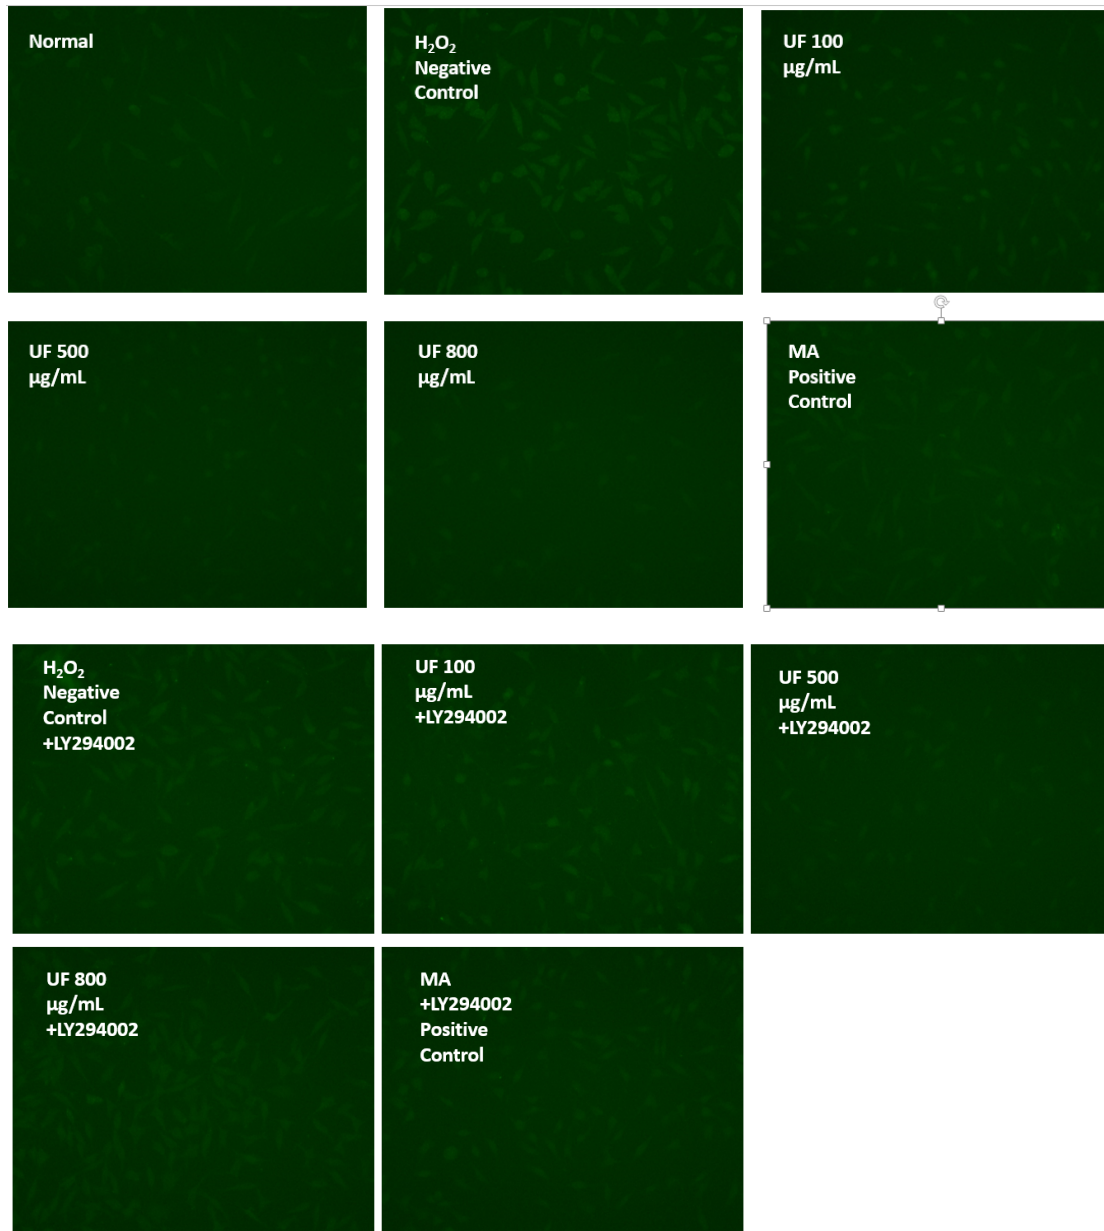

Figure S3a. Protective effects of UF on H<sub>2</sub>O<sub>2</sub>-induced SH-SY5Y cells of a relative density of AKt protein.

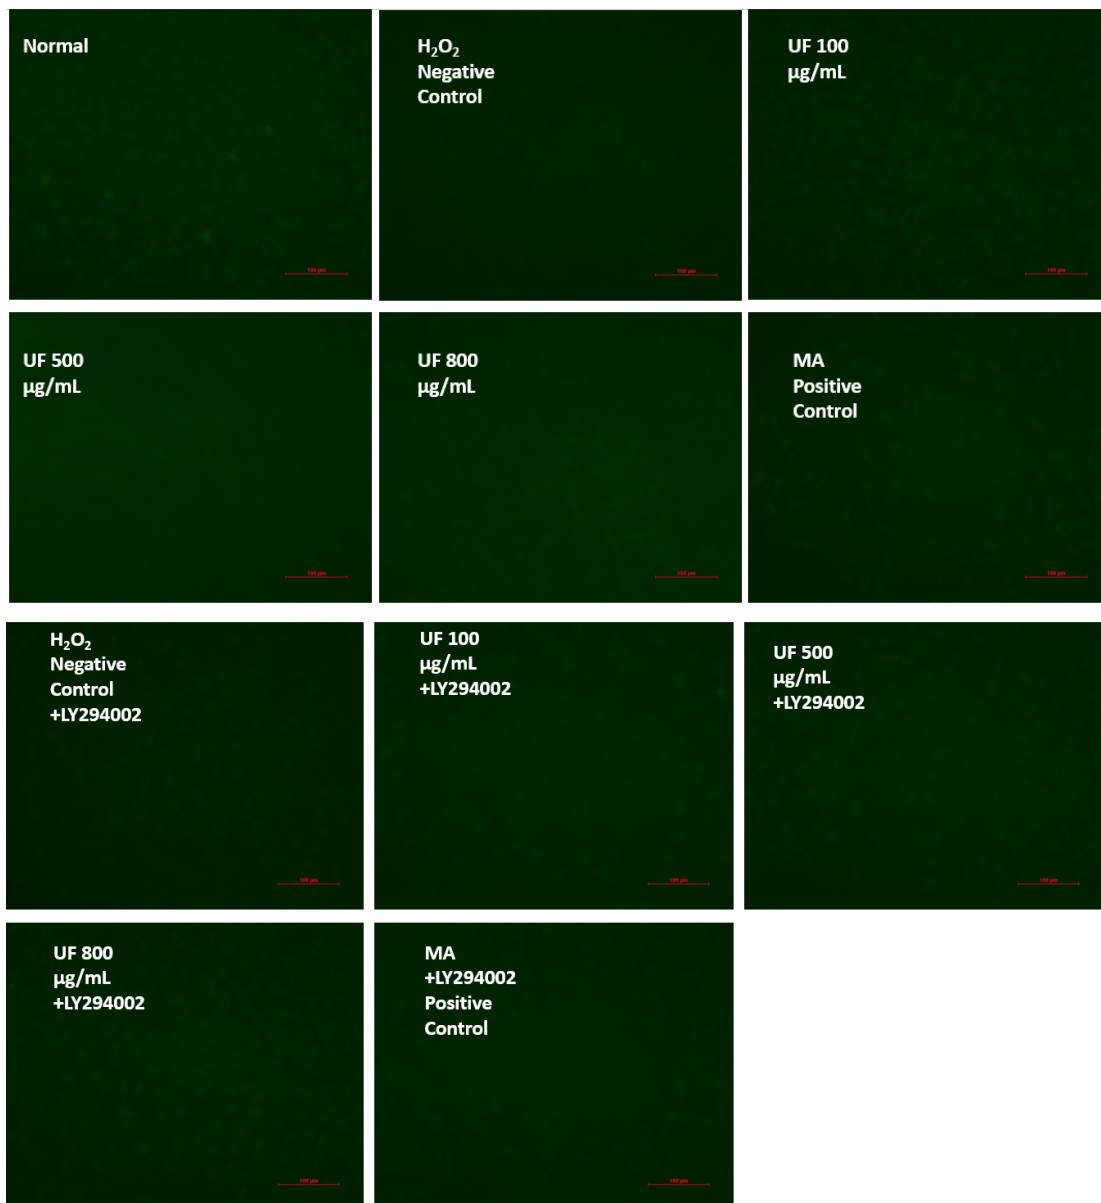

Figure S3b. Protective effects of UF on H<sub>2</sub>O<sub>2</sub>-induced SH-SY5Y cells of a relative density of PAKt protein.

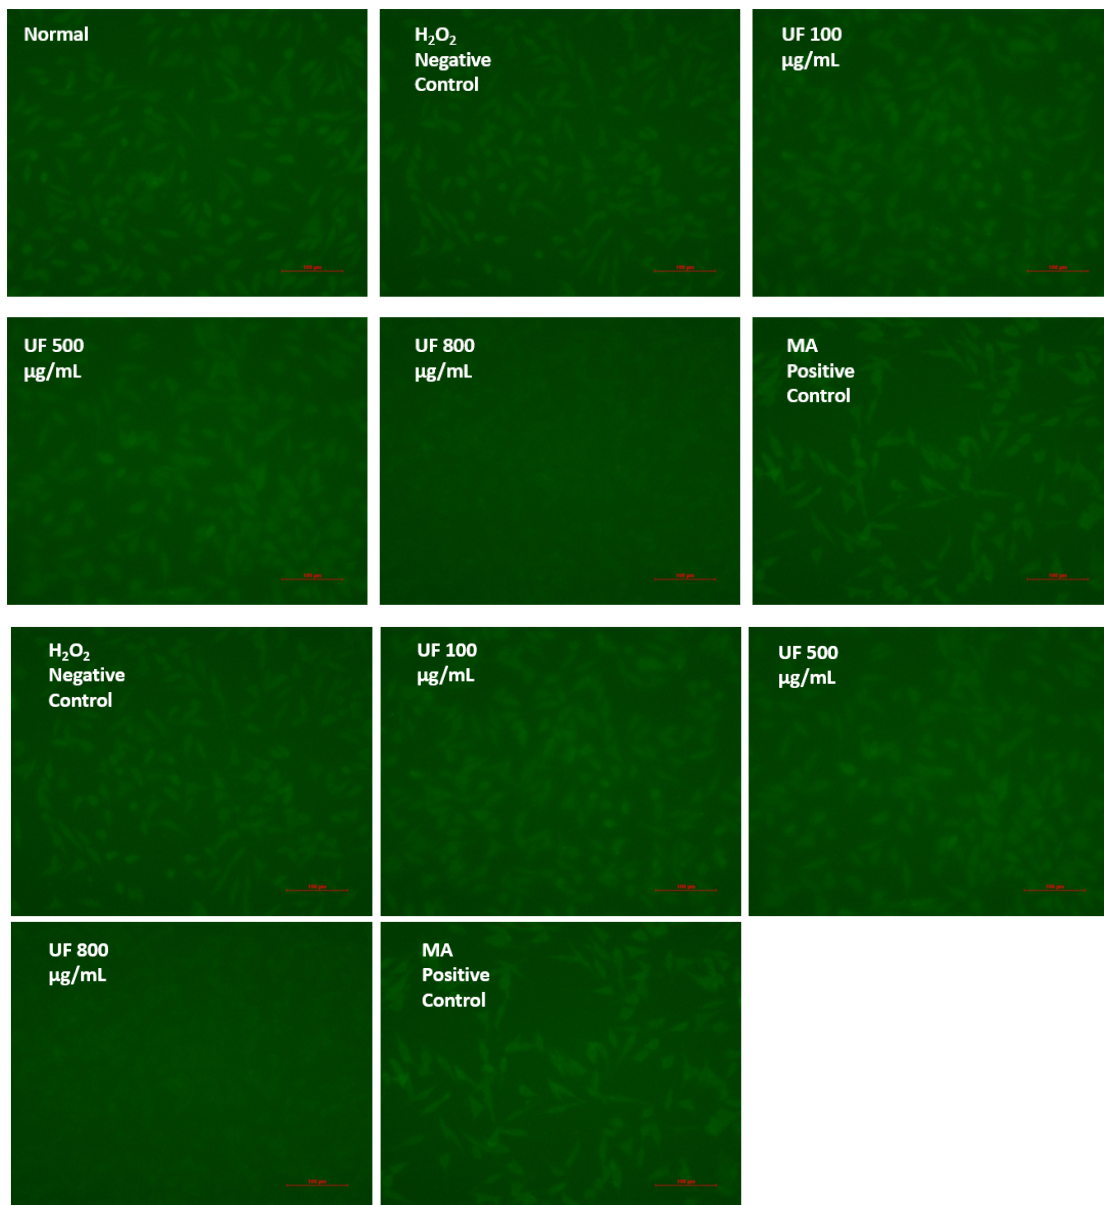

Figure S3 c. Protective effects of UF on H<sub>2</sub>O<sub>2</sub>-induced SH-SY5Y cells of a relative density of PI3K protein.

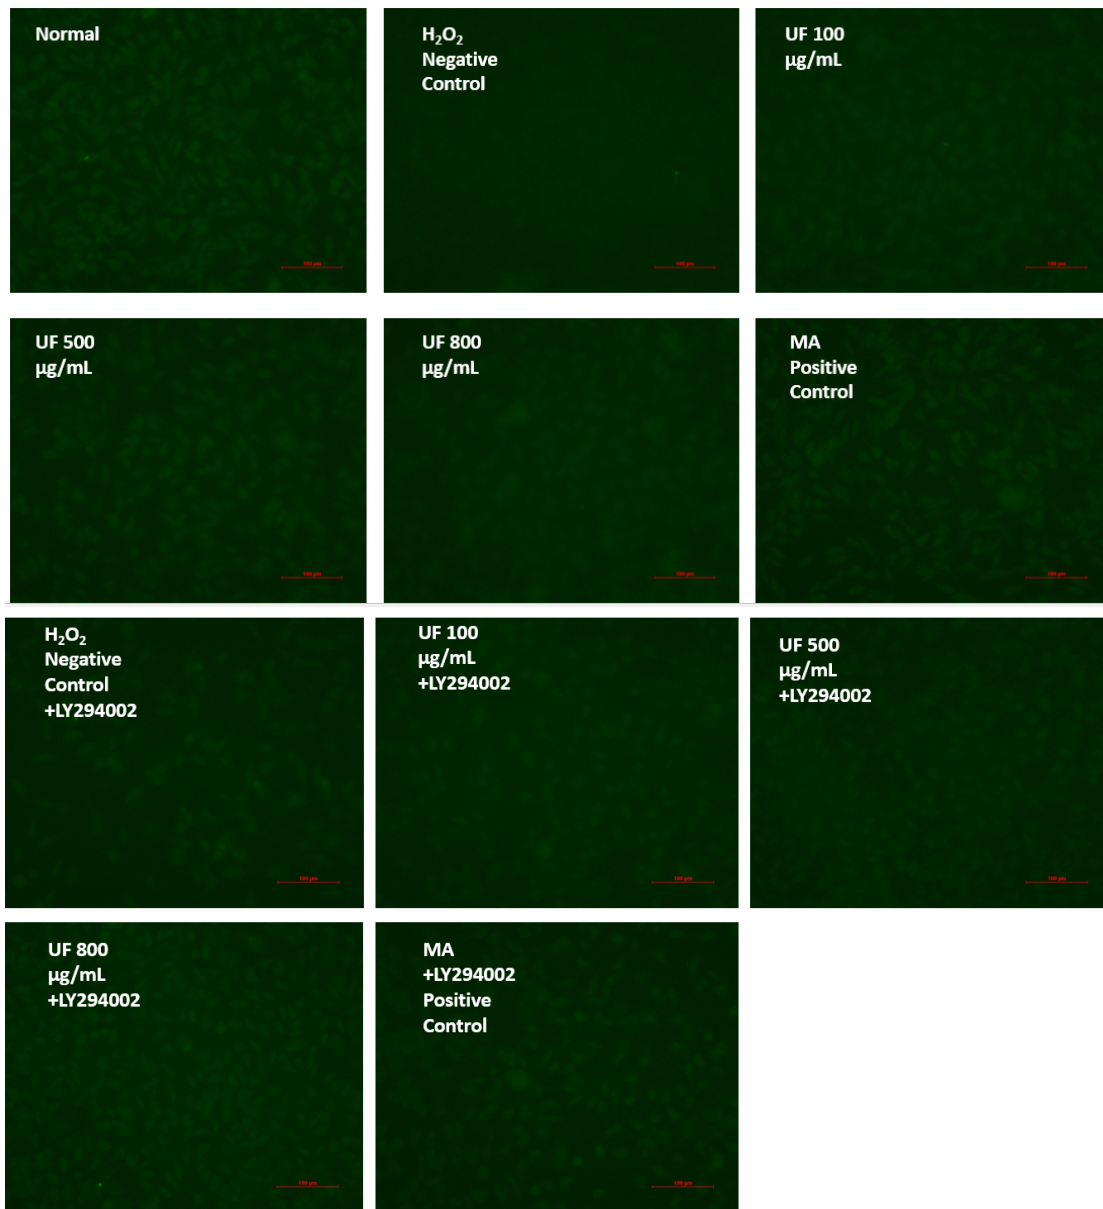

Figure S3 d. Protective effects of UF on H<sub>2</sub>O<sub>2</sub>-induced SH-SY5Y cells of a relative density of P-PI3K protein.

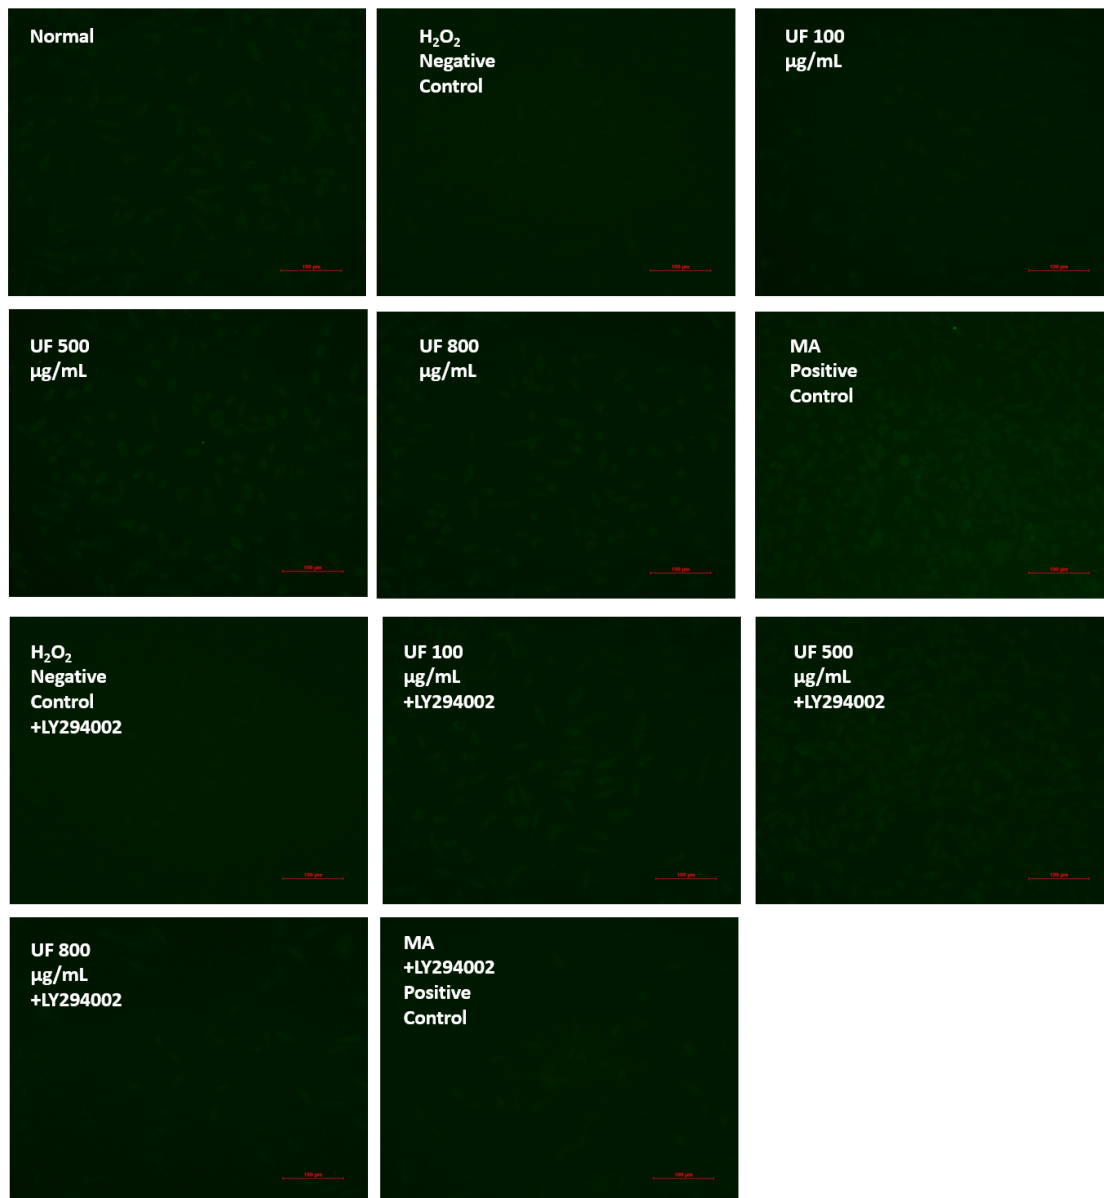

Figure S3 e. Protective effects of UF on H<sub>2</sub>O<sub>2</sub>-induced SH-SY5Y cells of a relative density of Bcl-2 protein.

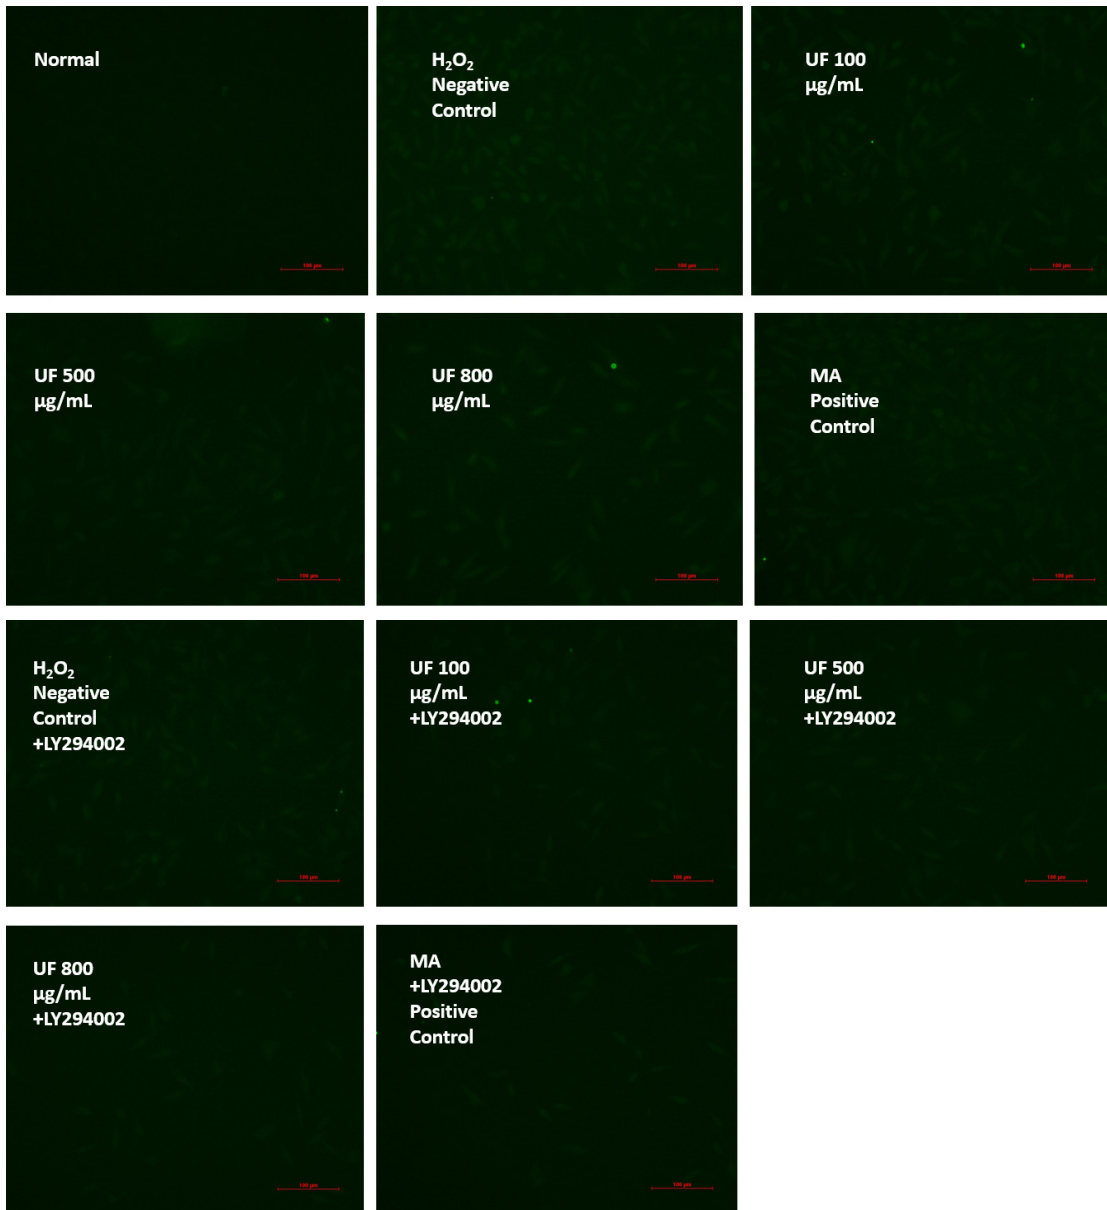

Figure S3 f. Protective effects of UF on H<sub>2</sub>O<sub>2</sub>-induced SH-SY5Y cells of a relative density of BAD protein.

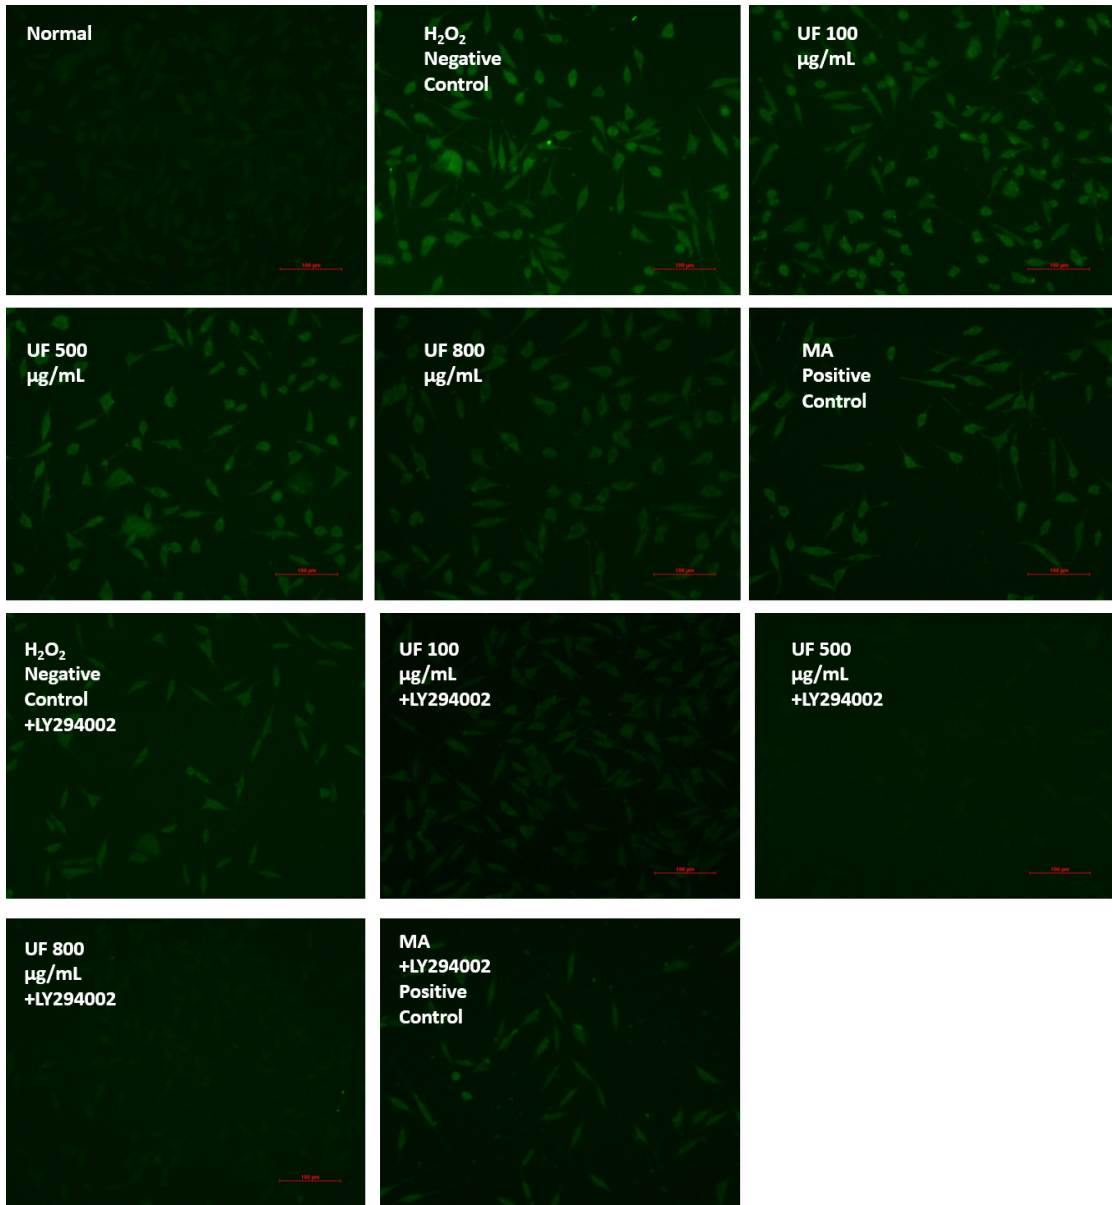

Figure S3 g. Protective effects of UF on H<sub>2</sub>O<sub>2</sub>-induced SH-SY5Y cells of a relative density of Bax protein.



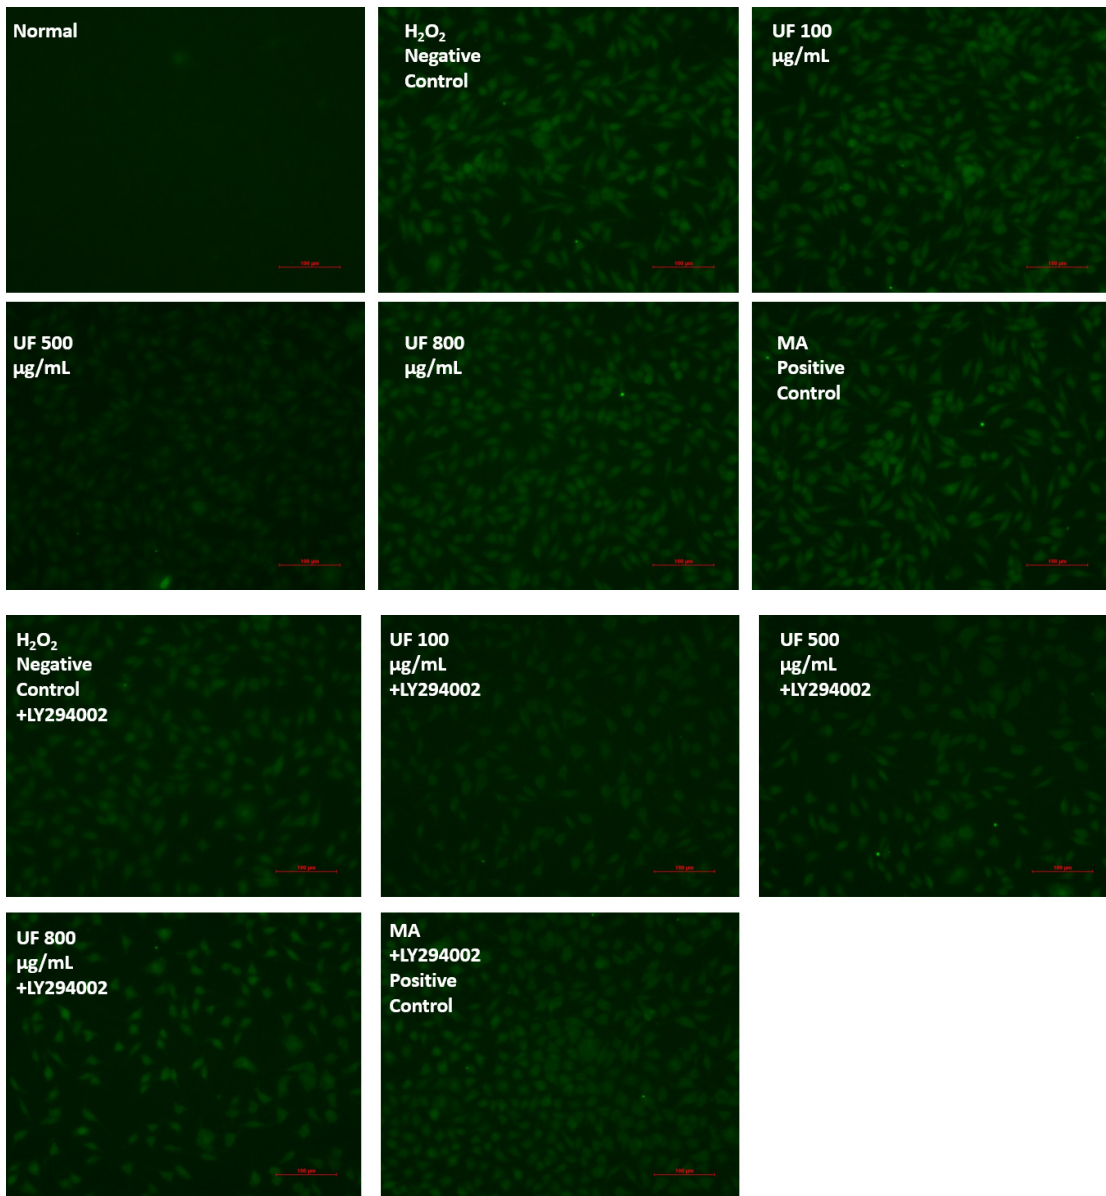

Figure S3 h. Protective effects of UF on H<sub>2</sub>O<sub>2</sub>-induced SH-SY5Y cells of a relative density of p53 protein.

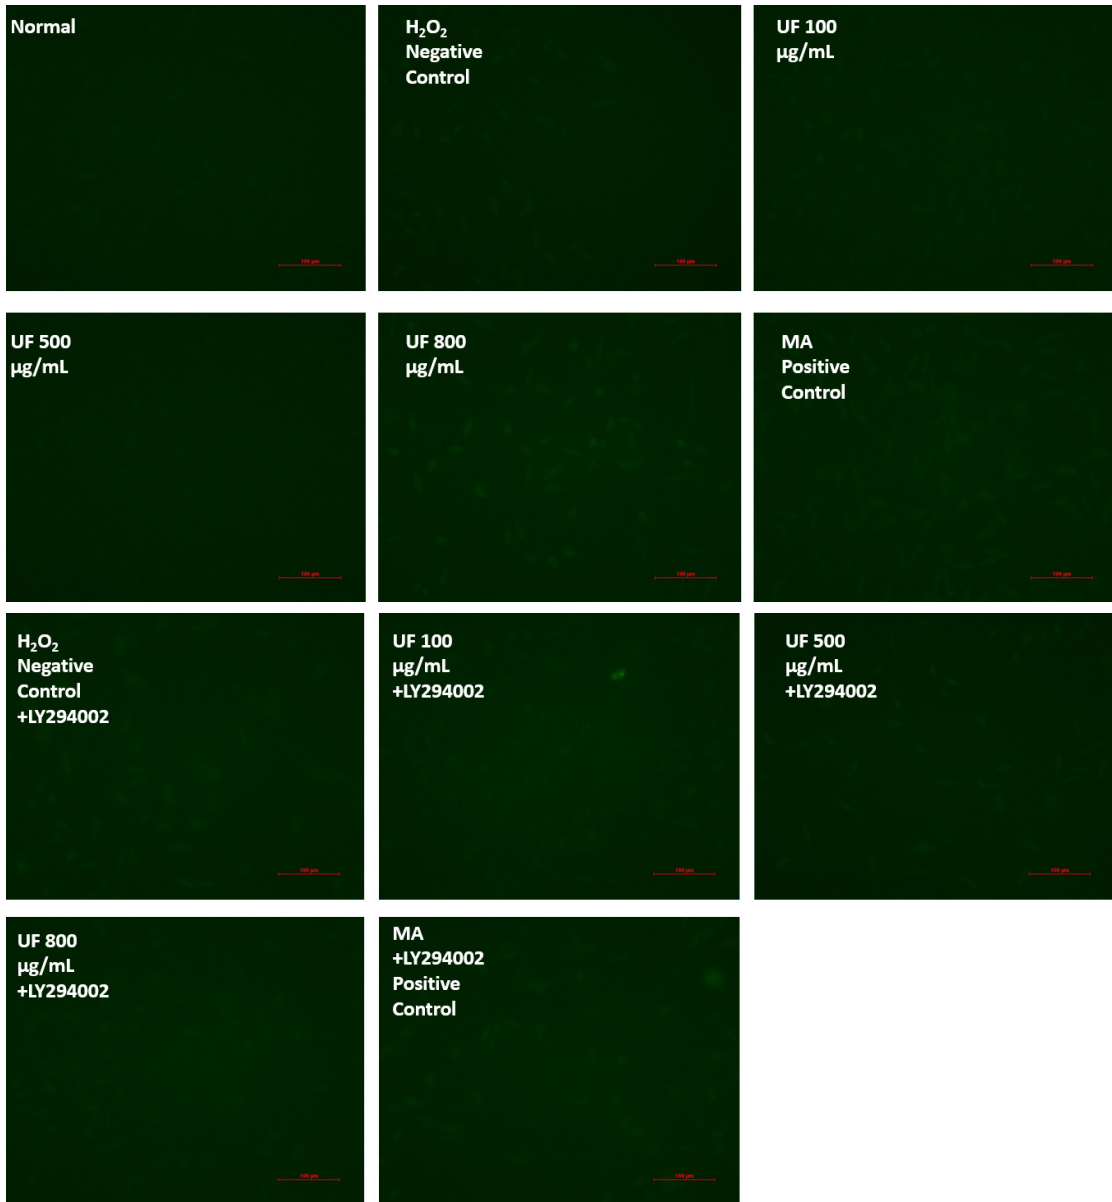

Figure S3 i. Protective effects of UF on H<sub>2</sub>O<sub>2</sub>-induced SH-SY5Y cells of a relative density of Cyt c protein.

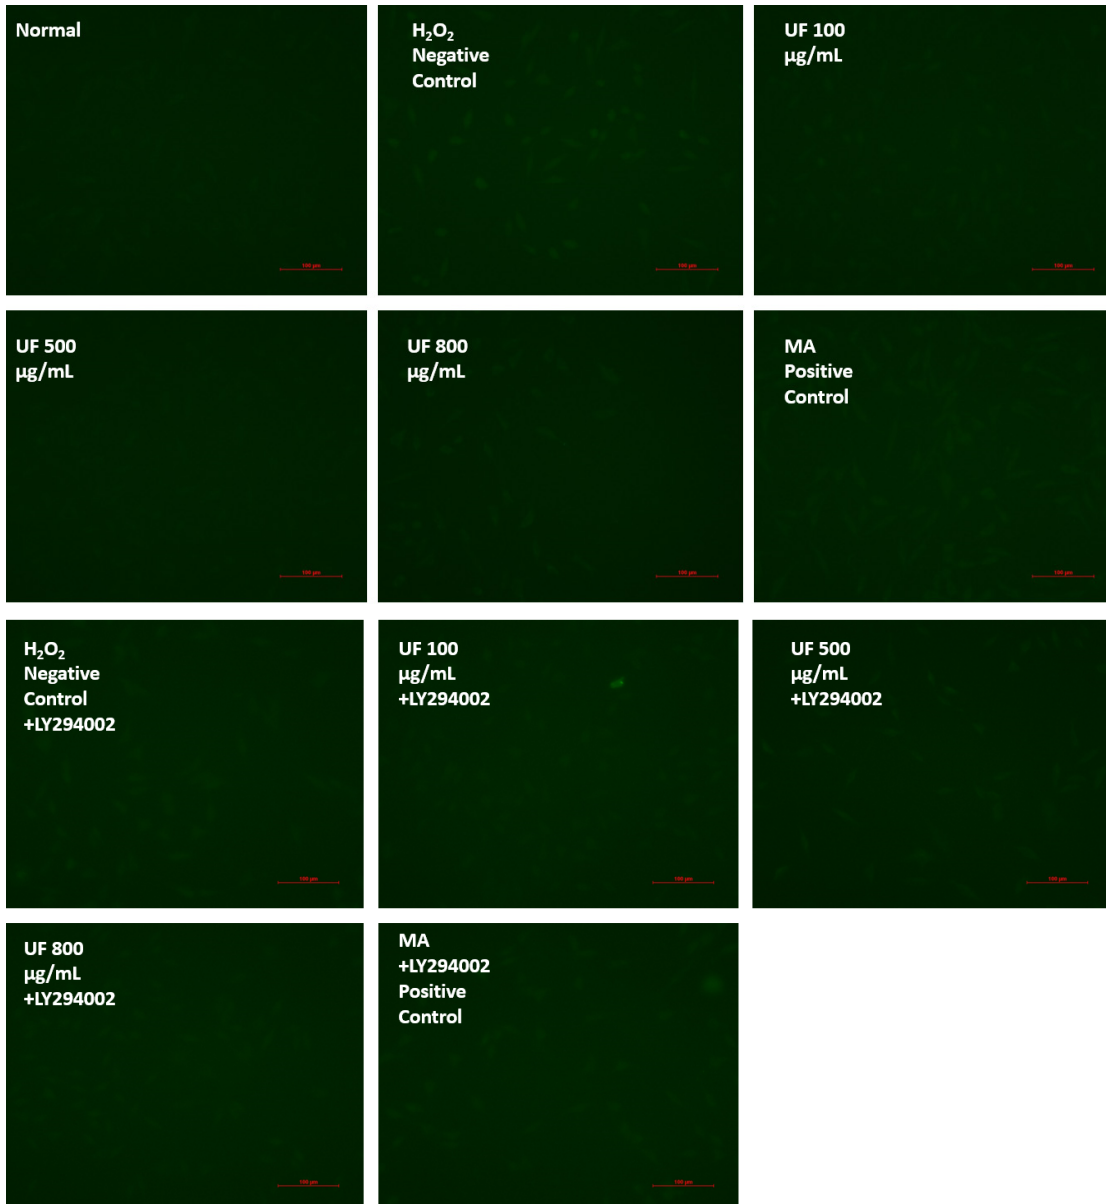

Figure S3 j. Protective effects of UF on H<sub>2</sub>O<sub>2</sub>-induced SH-SY5Y cells of a relative density of GSK3β protein.

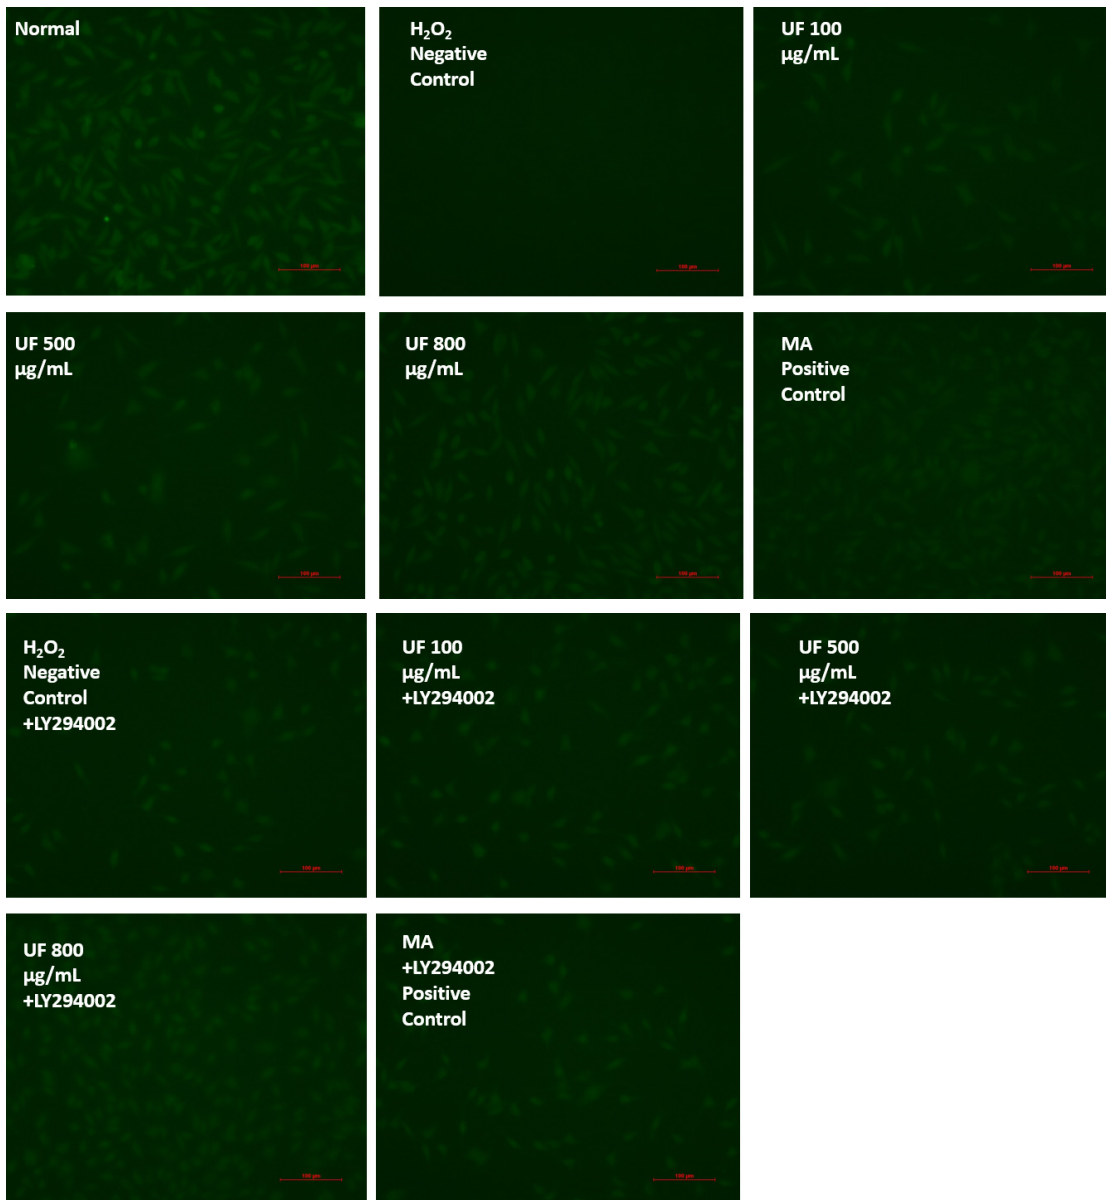

Figure S3 k. Protective effects of UF on H<sub>2</sub>O<sub>2</sub>-induced SH-SY5Y cells of a relative density of NGF protein.

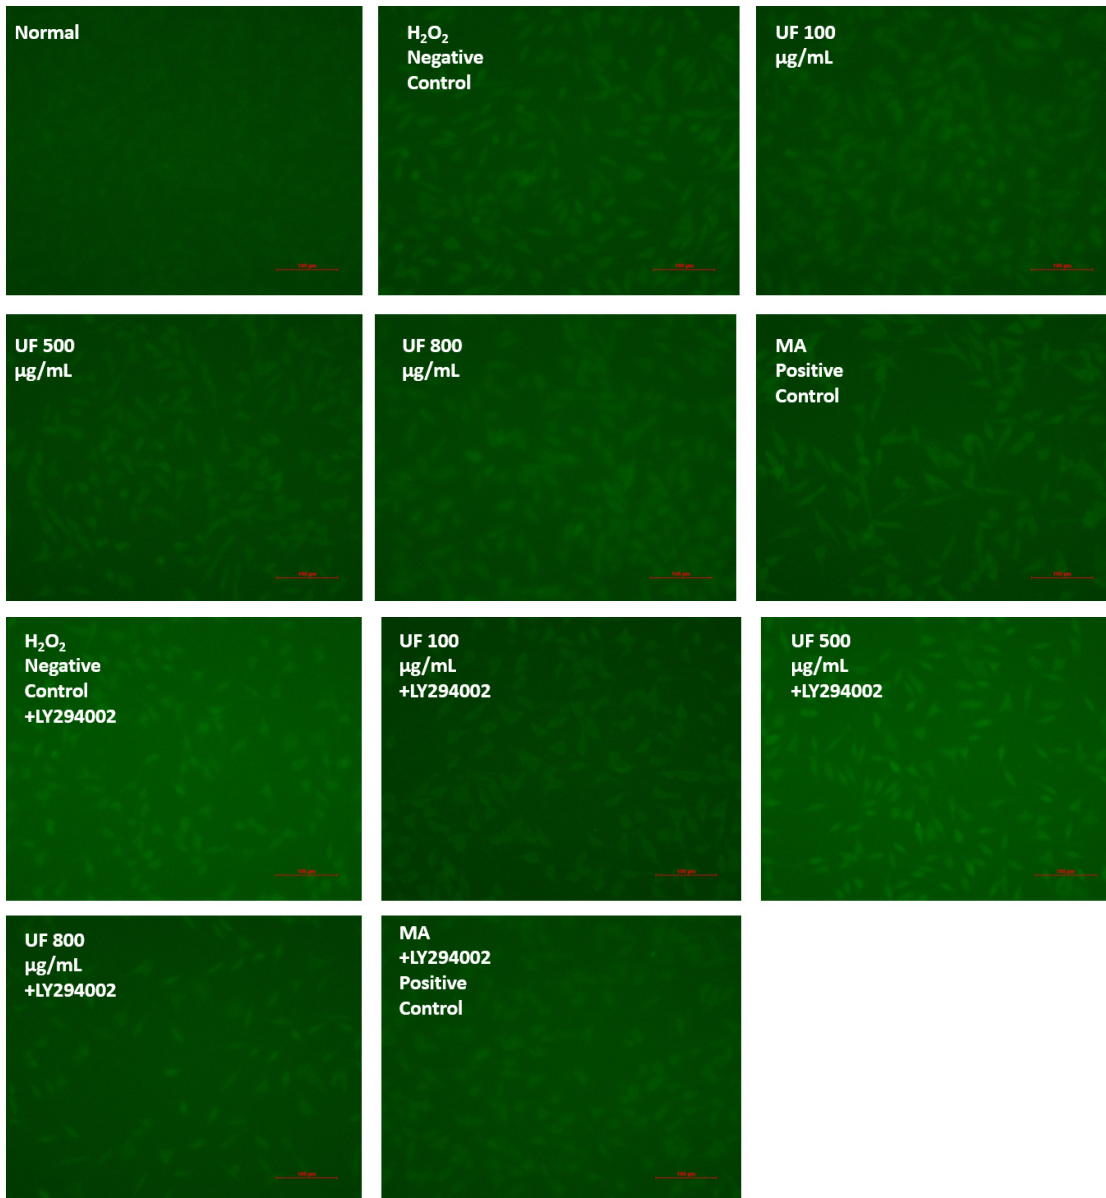

Figure S3 I. Protective effects of UF on H<sub>2</sub>O<sub>2</sub>-induced SH-SY5Y cells of a relative density of TrkA protein.

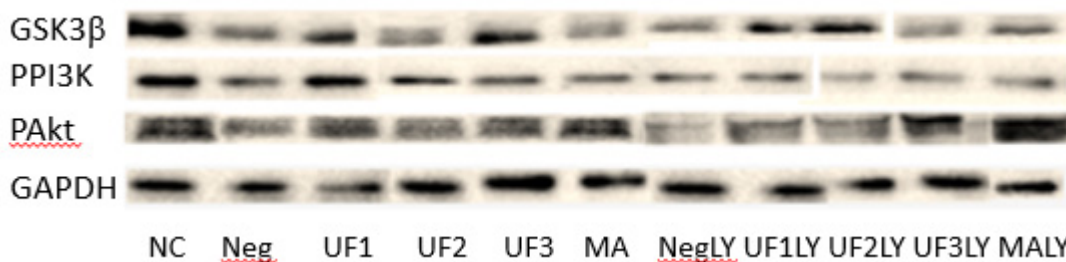

Figure S4. Western blotting analysis of PAkt, PPI3K, and GSK3 $\beta$  proteins on H<sub>2</sub>O<sub>2</sub>-induced SH-SY5Y cells. NC: Normal Control group, Neg: Negative Control group, UF1: UF 100  $\mu$ g/mL group, UF2: UF 500  $\mu$ g/mL group, UF3: UF 800  $\mu$ g/mL group, MA: Positive Control group, NCLY: Normal Control group+LY294002, NegLY: Negative Control group+LY294002, UF1LY: UF 100  $\mu$ g/mL group+LY294002, UF2LY: UF 500  $\mu$ g/mL group+LY294002, UF3LY: UF 800  $\mu$ g/mL group+LY294002, MALY: Positive Control group+LY294002, # P<0.05, ## P<0.01, ### P<0.001 (Vs NC), \* P<0.05, \*\* P<0.01, \*\*\* P<0.001 (Vs Neg), ^P<0.05, ^^P<0.01, ^^P<0.001, (Vs NegLY).
